# Supplementary material for: A Brief Review of the Role of 2D Mxene Nanosheets toward Solar Cells Efficiency Improvement
Source: MDPI journal article supplement (doi:10.3390/nano11102732), 2021-10-15
Supplement: s1 [file s1]

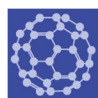

## Supplementary Materials

# A Brief Review of the Role of 2D Mxene Nanosheets toward Solar Cells Efficiency Improvement

**Table S1.** Summary of the key parameters for the solar cells employing MXenes as hole/electron transport layers Device.

| Device architecture                                                                                                                         | $J_{sc}$ (mA·cm <sup>-2</sup> ) | Voc (V) | FF (%) | PCE (%) | Year | Reference |
|---------------------------------------------------------------------------------------------------------------------------------------------|---------------------------------|---------|--------|---------|------|-----------|
| ITO/U-Ti <sub>3</sub> C <sub>2</sub> T <sub>x</sub> /PBDB-T:ITIC/Ca/Al (HTL)                                                                | 15.98                           | 0.89    | 64     | 9.02    | 2019 | [1]       |
| ITO/ETL/CH <sub>3</sub> NH <sub>3</sub> PbI <sub>3</sub> /spiro-OMeTAD/Ag                                                                   | 23.11                           | 1.07    | 74     | 18.29   | 2021 | [2]       |
| ITO/NiO/MAPbI <sub>3</sub> /PCBM/BCP/Ag                                                                                                     | 22.88                           | 1.09    | 77     | 19      | 2021 | [3]       |
| ITO/SnO <sub>2</sub> /perovskite/spiro-MeOTAD/MoO <sub>3</sub> /Au                                                                          | 24.96                           | 1.14    | 0.798  | 23.3    | 2021 | [4]       |
| FTO/Ti <sub>3</sub> C <sub>2</sub> T <sub>x</sub> @TiO <sub>2</sub> /Cs <sub>2</sub> AgBiBr <sub>6</sub> /Spiro-OMeTAD/MoO <sub>3</sub> /Ag | 4.14                            | 0.96    | 70     | 2.81    | 2021 | [5]       |
| MXene/m-SWCNTs (2:1)                                                                                                                        | 25.09                           | 1.073   | 80     | 21.42   | 2021 | [6]       |
| ITO/UH-Ti <sub>3</sub> C <sub>2</sub> T <sub>x</sub> /PBDB-T:ITIC/MoO <sub>3</sub> /Al (ETL)                                                | 17.36                           | 0.87    | 60     | 9.06    | 2019 | [1]       |

**Table S2.** Summary of the key parameters for the solar cells employing MXenes as electrodes.

| Device architecture                                                                                      | $J_{sc}$ (mA·cm <sup>-2</sup> ) | Voc (V) | FF (%) | PCE (%) | Year | Reference |
|----------------------------------------------------------------------------------------------------------|---------------------------------|---------|--------|---------|------|-----------|
| FTO/TiO <sub>2</sub> /MAPbI <sub>3</sub> /Ti <sub>3</sub> C <sub>2</sub> T <sub>x</sub>                  | 22.96                           | 0.95    | 63     | 13.83   | 2019 | [7]       |
| (Ti <sub>3</sub> C <sub>2</sub> )/(V <sub>2</sub> C)                                                     | 12.8                            | 0.724   | 45     | 7.2     | 2021 | [8]       |
| (ITO/treated Nb <sub>2</sub> CT <sub>x</sub> /MAPbI <sub>3</sub> )                                       | 23.06                           | 1.128   | 79.75  | 20.74   | 2021 | [9]       |
| FTO/c-TiO <sub>2</sub> /CsPbBr <sub>3</sub> /Carbon: CNT:Ti <sub>3</sub> C <sub>2</sub> T <sub>x</sub>   | 7.16                            | 1.357   | 72.97  | 7.09    | 2019 | [10]      |
| MXene/CoS composite CE                                                                                   | 21.29                           | 0.671   | 56.6   | 8.09    | 2021 | [11]      |
| Ti <sub>3</sub> C <sub>2</sub> CE-based DSSCs                                                            | 17.1                            | 0.758   | 73     | 8.68    | 2021 | [12]      |
| Ti <sub>3</sub> C <sub>2</sub> T <sub>x</sub> /n-Si/n-Si/p-Si/Al <sub>2</sub> O <sub>3</sub> /SiNx/Ag/Al | 36.7                            | 0.54    | 57.99  | 11.47   | 2019 | [13]      |

**Table S3.** Summary of the key parameters for the solar cells employing MXenes as an additive Device.

| Device architecture                                                                                                                                                                                                                                                         | $J_{sc}$ (mA·cm <sup>-2</sup> ) | Voc (V) | FF (%) | PCE (%) | Year | Reference |
|-----------------------------------------------------------------------------------------------------------------------------------------------------------------------------------------------------------------------------------------------------------------------------|---------------------------------|---------|--------|---------|------|-----------|
| FTO/c-TiO <sub>2</sub> :Ti <sub>3</sub> C <sub>2</sub> T <sub>x</sub> /m-TiO <sub>2</sub> :Ti <sub>3</sub> C <sub>2</sub> T <sub>x</sub> /Ti <sub>3</sub> C <sub>2</sub> T <sub>x</sub> /MAPbI <sub>3</sub> :Ti <sub>3</sub> C <sub>2</sub> T <sub>x</sub> /Spiro-OMeTAD/Au | 23.82                           | 1.09    | 77.6   | 20.14   | 2019 | [14]      |
| FTO/SnO <sub>2</sub> /CH <sub>3</sub> NH <sub>3</sub> PbI <sub>3</sub> /spiro-OMeTAD/Au                                                                                                                                                                                     | 23.48                           | 1.12    | 73.66  | 19.27   | 2021 | [15]      |
| FTO/SnO <sub>2</sub> -TiO <sub>x</sub> Cl <sub>4-2x</sub> /CsPbBr <sub>3</sub> :Ti <sub>3</sub> C <sub>2</sub> Cl <sub>x</sub> /Ti <sub>3</sub> C <sub>2</sub> Cl <sub>x</sub> /carbon                                                                                      | 7.87                            | 1.702   | 82.7   | 11.08   | 2021 | [16]      |
| Glass/ITO/SnO <sub>2</sub> /2D perovskite/Spiro-OMeTAD/Ag                                                                                                                                                                                                                   | 20.87                           | 1.11    | 67.84  | 15.71   | 2021 | [17]      |
| ITO/SnO <sub>2</sub> /MAPbI <sub>3</sub> :Ti <sub>3</sub> C <sub>2</sub> T <sub>x</sub> /Spiro-OMeTAD/Au                                                                                                                                                                    | 22.26                           | 1.03    | 76     | 17.41   | 2018 | [18]      |
| ITO/SnO <sub>2</sub> -Ti <sub>3</sub> C <sub>2</sub> /MAPbI <sub>3</sub> /Spiro-OMeTAD/Ag                                                                                                                                                                                   | 23.14                           | 1.06    | 75     | 18.34   | 2019 | [19]      |
| ITO/ZnO:Ti <sub>3</sub> C <sub>2</sub> T <sub>x</sub> /PBDB-T:ITIC/MoO <sub>3</sub> /Ag                                                                                                                                                                                     | 18.63                           | 0.93    | 70.39  | 12.2    | 2020 | [20]      |
| ITO/ZnO:Ti <sub>3</sub> C <sub>2</sub> T <sub>x</sub> /PM <sub>6</sub> :Y <sub>6</sub> /MoO <sub>3</sub> /Ag                                                                                                                                                                | 26.38                           | 0.83    | 75.4   | 16.51   | 2020 | [20]      |
| ITO/ZnO:Ti <sub>3</sub> C <sub>2</sub> T <sub>x</sub> /PTB7:PC <sub>71</sub> BM/MoO <sub>3</sub> /Ag                                                                                                                                                                        | 17.53                           | 0.77    | 69.33  | 9.36    | 2020 | [20]      |

## References

1. Yu, Z.; Feng, W.; Lu, W.; Li, B.; Yao, H.; Zeng, K.; Ouyang, J. MXenes with tunable work functions and their application as electron- and hole-transport materials in non-fullerene organic solar cells. *J. Mater. Chem. A* **2019**, *7*, 11160–11169. <https://doi.org/10.1039/c9ta01195a>.
2. Yang, L.; Kan, D.; Dall'Agnese, C.; Dall'Agnese, Y.; Wang, B.; Jena, A.K.; Wei, Y.; Chen, G.; Wang, X.-F.; Gogotsi, Y.; et al. Performance improvement of MXene-based perovskite solar cells upon property transition from metallic to semiconductive by oxidation of  $\text{Ti}_3\text{C}_2\text{T}_x$  in air. *J. Mater. Chem. A* **2021**, *9*, 5016–5025. <https://doi.org/10.1039/d0ta11397b>.
3. Saranin, D.; Pescetelli, S.; Pazniak, A.; Rossi, D.; Liedl, A.; Yakusheva, A.; Luchnikov, L.; Podgorny, D.; Gostischev, P.; Didenko, S.; et al. Transition metal carbides (MXenes) for efficient NiO-based inverted perovskite solar cells. *Nano Energy* **2021**, *82*, 105771. <https://doi.org/10.1016/j.nanoen.2021.105771>.
4. Yang, Y.; Lu, H.; Feng, S.; Yang, L.; Dong, H.; Wang, J.; Tian, C.; Li, L.; Lu, H.; Jeong, J.; et al. Modulation of perovskite crystallization processes towards highly efficient and stable perovskite solar cells with MXene quantum dot-modified  $\text{SnO}_2$ . *Energy Environ. Sci.* **2021**, *14*, 3447–3454. <https://doi.org/10.1039/d1ee00056j>.
5. Li, Z.; Wang, P.; Ma, C.; Igbari, F.; Kang, Y.; Wang, K.-L.; Song, W.; Dong, C.; Li, Y.; Yao, J.; et al. Single-Layered MXene Nanosheets Doping  $\text{TiO}_2$  for Efficient and Stable Double Perovskite Solar Cells. *J. Am. Chem. Soc.* **2021**, *143*, 2593–2600. <https://doi.org/10.1021/jacs.0c12739>.
6. Bati, A.S.R.; Hao, M.; Macdonald, T.J.; Batmunkh, M.; Yamauchi, Y.; Wang, L.; Shapter, J.G. 1D–2D Synergistic MXene-Nanotubes Hybrids for Efficient Perovskite Solar Cells. *Small* **2021**, *17*, 2101925. <https://doi.org/10.1002/sml.202101925>.
7. Cao, J.; Meng, F.; Gao, L.; Yang, S.; Yan, Y.; Wang, N.; Liu, A.; Li, Y.; Ma, T. Alternative electrodes for HTMs and noble-metal-free perovskite solar cells: 2D MXenes electrodes. *RSC Adv.* **2019**, *9*, 34152–34157. <https://doi.org/10.1039/c9ra06091j>.
8. Xu, C.; Zhao, X.; Sun, M.; Ma, J.; Wu, M. Highly effective 2D layered carbides counter electrode for iodide redox couple regeneration in dye-sensitized solar cells. *Electrochim. Acta* **2021**, *392*, 138983. <https://doi.org/10.1016/j.electacta.2021.138983>.
9. Zhang, J.; Huang, C.; Yu, H. Modulate the work function of  $\text{Nb}_2\text{CT}_x$  MXene as the hole transport layer for perovskite solar cells. *Appl. Phys. Lett.* **2021**, *119*, 033506. <https://doi.org/10.1063/5.0057978>.
10. Mi, L.; Zhang, Y.; Chen, T.; Xu, E.; Jiang, Y. Carbon electrode engineering for high efficiency all-inorganic perovskite solar cells. *RSC Adv.* **2020**, *10*, 12298–12303. <https://doi.org/10.1039/d0ra00288g>.
11. Chen, X.; Zhuang, Y.; Shen, Q.; Cao, X.; Yang, W.; Yang, P. In situ synthesis of  $\text{Ti}_3\text{C}_2\text{T}_x$  MXene/CoS nanocomposite as high performance counter electrode materials for quantum dot-sensitized solar cells. *Sol. Energy* **2021**, *226*, 236–244. <https://doi.org/10.1016/j.solener.2021.08.053>.
12. Ahmad, M.S.; Pandey, A.; Rahim, N.A.; Aslfattahi, N.; Mishra, Y.K.; Rashid, B.; Saidur, R. 2-D Mxene flakes as potential replacement for both TCO and Pt layers for Dye-Sensitized Solar cell. *Ceram. Int.* **2021**, *47*, 27942–27947. <https://doi.org/10.1016/j.ceramint.2021.06.225>.
13. Fu, H.; Ramalingam, V.; Kim, H.; Lin, C.-H.; Fang, X.; Alshareef, H.N.; He, J. MXene-Contacted Silicon Solar Cells with 11.5% Efficiency. *Adv. Energy Mater.* **2019**, *9*, 1–9. <https://doi.org/10.1002/aenm.201900180>.
14. Agresti, A.; Pazniak, A.; Pescetelli, S.; Di Vito, A.; Rossi, D.; Pecchia, A.; Der Maur, M.A.; Liedl, A.; Larciprete, R.; Kuznetsov, D.V.; et al. Titanium-carbide MXenes for work function and interface engineering in perovskite solar cells. *Nat. Mater.* **2019**, *18*, 1228–1234. <https://doi.org/10.1038/s41563-019-0478-1>.
15. Zhao, Y.; Zhang, X.; Han, X.; Hou, C.; Wang, H.; Qi, J.; Li, Y.; Zhang, Q. Tuning the reactivity of  $\text{PbI}_2$  film via monolayer  $\text{Ti}_3\text{C}_2\text{T}_x$  MXene for two-step-processed  $\text{CH}_3\text{NH}_3\text{PbI}_3$  solar cells. *Chem. Eng. J.* **2021**, *417*, 127912. <https://doi.org/10.1016/j.cej.2020.127912>.
16. Zhou, Q.; Duan, J.; Du, J.; Guo, Q.; Zhang, Q.; Yang, X.; Duan, Y.; Tang, Q. Tailored Lattice “Tape” to Confine Tensile Interface for 11.08%-Efficiency All-Inorganic  $\text{CsPbBr}_3$  Perovskite Solar Cell with an Ultrahigh Voltage of 1.702 V. *Adv. Sci.* **2021**, *2101418*, 2101418. <https://doi.org/10.1002/advs.202101418>.
17. Jin, X.; Yang, L.; Wang, X.-F. Efficient Two-Dimensional Perovskite Solar Cells Realized by Incorporation of  $\text{Ti}_3\text{C}_2\text{T}_x$  MXene as Nano-Dopants. *Nano-Micro Lett.* **2021**, *13*, 68. <https://doi.org/10.1007/s40820-021-00602-w>.
18. Guo, Z.; Gao, L.; Xu, Z.; Teo, S.; Zhang, C.; Kamata, Y.; Hayase, S.; Ma, T. High Electrical Conductivity 2D MXene Serves as Additive of Perovskite for Efficient Solar Cells. *Small* **2018**, *14*, e1802738. <https://doi.org/10.1002/sml.201802738>.
19. Yang, L.; Dall'Agnese, Y.; Hantanasirisakul, K.; Shuck, C.E.; Maleski, K.; Alhabeab, M.; Chen, G.; Gao, Y.; Sanehira, Y.; Jena, A.K.; et al.  $\text{SnO}_2$ - $\text{Ti}_3\text{C}_2$  MXene electron transport layers for perovskite solar cells. *J. Mater. Chem. A* **2019**, *7*, 5635–5642. <https://doi.org/10.1039/c8ta12140k>.
20. Hou, C.; Yu, H.  $\text{ZnO}/\text{Ti}_3\text{C}_2\text{T}_x$  monolayer electron transport layers with enhanced conductivity for highly efficient inverted polymer solar cells. *Chem. Eng. J.* **2021**, *407*, 127192. <https://doi.org/10.1016/j.cej.2020.127192>.
